# Supplementary material
Source: PubMed Central journal article supplement (PMC7899499)
Supplement: boe-12-1-320-s001.pdf [file boe-12-1-320-s001.pdf]

## Direct measurement of the scattering coefficient: supplement

**MARTIN HOHMANN,<sup>1,2,\*</sup> BENJAMIN LENGENFELDER,<sup>1,2</sup> DANIEL MUHR,<sup>1</sup> MORITZ SPÄTH,<sup>1,2</sup> MAXIMILIAN HAUPTKORN,<sup>1</sup> FLORIAN KLÄMPFL,<sup>1,2</sup> AND MICHAEL SCHMIDT<sup>1,2</sup>**

<sup>1</sup>*Institute of Photonic Technologies (LPT), Friedrich-Alexander-Universität Erlangen-Nürnberg (FAU), Germany*

<sup>2</sup>*Erlangen Graduate School in Advanced Optical Technologies (SAOT), Paul-Gordan-Straße 6, 91052 Erlangen, Germany*

\**Martin.Hohmann@FAU.de*

---

This supplement published with The Optical Society on 14 December 2020 by The Authors under the terms of the [Creative Commons Attribution 4.0 License](https://creativecommons.org/licenses/by/4.0/) in the format provided by the authors and unedited. Further distribution of this work must maintain attribution to the author(s) and the published article's title, journal citation, and DOI.

Supplement DOI: <https://doi.org/10.6084/m9.figshare.13274681>

Parent Article DOI: <https://doi.org/10.1364/BOE.410248>

## Attachments: Direct measurement of the scattering coefficient

**MARTIN HOHMANN<sup>1,2,\*</sup>, BENJAMIN LENGENFELDER<sup>1,2</sup>, DANIEL MUHR<sup>1</sup>, MORITZ SPÄTH<sup>1,2</sup>, MAXIMILIAN HAUPTKORN<sup>1</sup>, FLORIAN KLÄMPFL<sup>1,2</sup>, MICHAEL SCHMIDT<sup>1,2</sup>**

<sup>1</sup>Institute of Photonic Technologies (LPT), Friedrich-Alexander-Universität Erlangen-Nürnberg (FAU), Germany

<sup>2</sup>Erlangen Graduate School in Advanced Optical Technologies (SAOT), Paul-Gordan-Straße 6, 91052 Erlangen, Germany

[Martin.Hohmann@FAU.de](mailto:Martin.Hohmann@FAU.de)

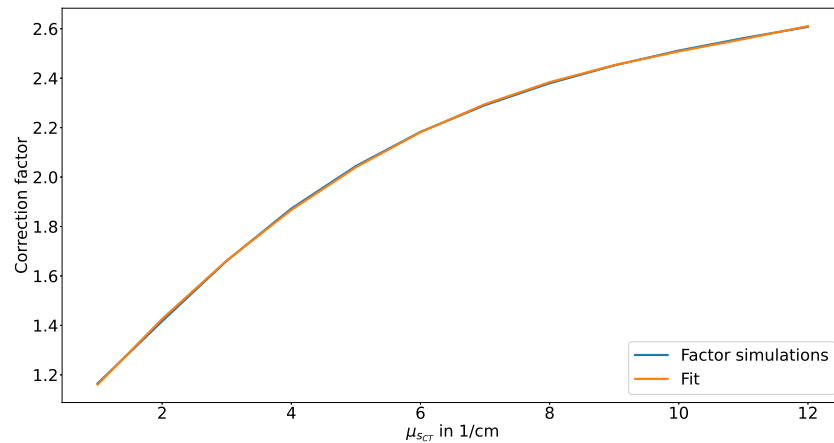

Figure 1: Factor by which TT would be higher for the case of planes with a width and height of 6 cm instead of a cuvette for low absorption coefficients (smaller than  $0.01 \frac{1}{cm}$ ). With this size, nearly all photons can be measured, which are able to pass through. The lower correction factor for low scattering is caused by the fact that not enough light is scattered to affect the result.
